# Supplementary material for: Salmonella exploits host- and bacterial-derived β-alanine for replication inside host macrophages
Source: eLife. 2025 Jun 19;13:RP103714. doi: 10.7554/eLife.103714 (PMC12178601; doi:10.7554/eLife.103714)
Supplement: Figure 1—figure supplement 1—source data 1. [file elife-103714-fig1-figsupp1-data1.xlsx]

## Sheet: Sheet1
Figure 1_figure Supplement 1	The ROS and RNS levels in RAW264.7 cells (-, + 1 mM β-alanine in culture medium for 8 h) after infection with Salmonella WT for 8 h, in the presence or absence of 1 mM β-alanine
ROS level/ 105 cells			RNS level/ 105 cells
WT	WT+1mM β-alanine		WT	WT+1mM β-alanine
35388.4	34020.9		38394.2	34779.5
29461.2	32198.7		35571.7	40218.8
32627.1	31882.4		36694.9	42886.3
The data is normalized by the number of cells
