# Supplementary material for: Salmonella exploits host- and bacterial-derived β-alanine for replication inside host macrophages
Source: eLife. 2025 Jun 19;13:RP103714. doi: 10.7554/eLife.103714 (PMC12178601; doi:10.7554/eLife.103714)
Supplement: Figure 1—figure supplement 2—source data 1. [file elife-103714-fig1-figsupp2-data1.xlsx]

## Sheet: Sheet1
Figure 1_figure Supplement 2	Flow cytometry analysis of percentage of pro-inflammatory M1 macrophages (CD86+) and anti-_x001f_inflammatory M2 macrophages (CD163+). RAW264.7 cell were infected Salmonella WT for 8 h, in the presence or absence of 1 mM β-alanine
	WT			WT+1 mM β-alanine
M1 (CD86+)	91	90.5	86.3	92.5	91.4	89
M2 (CD163+)	63.2	65	66.8	61	65	63.6
