# Supplementary material for: Salmonella exploits host- and bacterial-derived β-alanine for replication inside host macrophages
Source: eLife. 2025 Jun 19;13:RP103714. doi: 10.7554/eLife.103714 (PMC12178601; doi:10.7554/eLife.103714)
Supplement: Figure 1—figure supplement 4—source data 1. [file elife-103714-fig1-figsupp4-data1.xlsx]

## Sheet: Sheet1
Figure 1_figure Supplement 4	Growth curves of Salmonella WT and the cycA mutant (ΔcycA) in M9 minimal medium supplemented with β-alanine (1 mM) as the sole carbon source
Time (h)	WT			ΔcycA
0	0.1224	0.1226	0.122	0.1222	0.1224	0.122
0.5	0.1232	0.1234	0.1231	0.1225	0.1233	0.1227
1	0.124	0.1239	0.1236	0.1233	0.124	0.1236
1.5	0.1245	0.1248	0.1241	0.1241	0.1239	0.1243
2	0.1254	0.1249	0.1246	0.1243	0.125	0.1247
2.5	0.1258	0.1253	0.1251	0.1248	0.1255	0.1258
3	0.1259	0.1257	0.1265	0.1254	0.1259	0.1263
3.5	0.1266	0.1276	0.1267	0.1262	0.1267	0.1265
4	0.1272	0.1268	0.1274	0.127	0.1275	0.1269
4.5	0.1277	0.1273	0.128	0.1277	0.1281	0.1275
5	0.1281	0.1292	0.1281	0.1278	0.1287	0.1278
5.5	0.1285	0.1298	0.1291	0.1283	0.1293	0.1282
6	0.1291	0.1305	0.1296	0.1284	0.1302	0.1287
6.5	0.1291	0.1309	0.1301	0.1289	0.1306	0.1293
7	0.1299	0.1317	0.1304	0.1291	0.1317	0.1302
7.5	0.13	0.132	0.1311	0.1295	0.1322	0.1309
8	0.1302	0.1327	0.1316	0.13	0.1328	0.1314
8.5	0.1308	0.1329	0.1319	0.1304	0.1328	0.1323
9	0.1309	0.1333	0.133	0.1308	0.1333	0.1329
9.5	0.1312	0.1336	0.1326	0.1312	0.1338	0.1335
10	0.1314	0.1318	0.1317	0.1304	0.1302	0.1318
10.5	0.1316	0.1318	0.1322	0.1308	0.1306	0.1326
11	0.132	0.132	0.1314	0.1307	0.1309	0.1331
11.5	0.1323	0.1325	0.1318	0.1307	0.1307	0.1334
12	0.1325	0.1322	0.1319	0.1308	0.131	0.1338
12.5	0.1329	0.1331	0.1327	0.1311	0.1312	0.1341
