# Supplementary material for: Salmonella exploits host- and bacterial-derived β-alanine for replication inside host macrophages
Source: eLife. 2025 Jun 19;13:RP103714. doi: 10.7554/eLife.103714 (PMC12178601; doi:10.7554/eLife.103714)
Supplement: Figure 1—figure supplement 5—source data 1. [file elife-103714-fig1-figsupp5-data1.xlsx]

## Sheet: Sheet1
Figure 1_figure Supplement 5	Fold intracellular replication of Salmonella wild-type and ΔcycA in RAW264.7 cells
WT	ΔcycA
12.18	12.5
12.7	11.15
14.14	13.38
9.32	12.45
The data is normalized by the number of cells
Raw CFU counts
①	2 h	CFUs/ 103 cells		②	2 h	CFUs/ 103 cells		③	2 h	CFUs/ 103 cells		④	2 h	CFUs/ 103 cells
	WT	2600			WT	6350			WT	7000			WT	2200
	ΔcycA	4000			ΔcycA	1058			ΔcycA	1430			ΔcycA	8200
	20 h	CFUs/ 103 cells			20 h	CFUs/ 103 cells			20 h	CFUs/ 103 cells			20 h	CFUs/ 103 cells
	WT	31670			WT	80670			WT	99000			WT	20500
	ΔcycA	50000			ΔcycA	11800			ΔcycA	19133			ΔcycA	102128
The data is normalized by the number of cells
