# Supplementary material for: Salmonella exploits host- and bacterial-derived β-alanine for replication inside host macrophages
Source: eLife. 2025 Jun 19;13:RP103714. doi: 10.7554/eLife.103714 (PMC12178601; doi:10.7554/eLife.103714)
Supplement: Figure 1—figure supplement 6—source data 1. [file elife-103714-fig1-figsupp6-data1.xlsx]

## Sheet: Sheet1
Figure 1_figure Supplement 6	Liver and spleen bacterial burdens, and body weight of mice infected with Salmonella wild-type (STM) and cycA mutant (ΔcycA), at day 3 post-infection. n = 5 mice per group.
WT-liver	ΔcycA-liver
7.01875	7.35141
7.80956	7.18877
7.66618	7.40508
7.01994	7.36798
7.55401	7.45754
WT-spleen	ΔcycA-spleen
8.66467	7.83218
8.19473	8.11616
8.22967	8.04414
8.3241	7.95424
7.97321	8.30431
WT-body weight	ΔcycA-body weight
12.987	11.26
12.185	11.2
12.018	10.53
10.8	11.77
11.66	11.17
bacterial burdens: log10(CFU/g organ)
body weight: g
