# Supplementary material for: Salmonella exploits host- and bacterial-derived β-alanine for replication inside host macrophages
Source: eLife. 2025 Jun 19;13:RP103714. doi: 10.7554/eLife.103714 (PMC12178601; doi:10.7554/eLife.103714)
Supplement: Figure 1—figure supplement 7—source data 1. [file elife-103714-fig1-figsupp7-data1.xlsx]

## Sheet: Sheet1
Figure 1_figure Supplement 7	Growth curves of Salmonella WT and the gabP mutant (ΔgabP) in N-minimal medium supplemented with β-alanine (1 mM) as the sole carbon source
Time(h)	WT			∆gabP
0	0.1234	0.1235	0.1243	0.1244	0.1238	0.1229
0.5	0.1248	0.1249	0.1256	0.1258	0.1252	0.1237
1	0.1258	0.126	0.1262	0.127	0.1255	0.1264
1.5	0.1254	0.1267	0.1276	0.1261	0.1267	0.127
2	0.1274	0.1277	0.1277	0.1278	0.1262	0.1278
2.5	0.1276	0.1277	0.1279	0.1263	0.1278	0.128
3	0.1274	0.1277	0.1277	0.1278	0.1263	0.1279
3.5	0.1276	0.129	0.1279	0.1274	0.1286	0.1279
4	0.1276	0.1288	0.1278	0.1276	0.1285	0.1277
4.5	0.129	0.128	0.127	0.1276	0.1276	0.1288
5	0.1291	0.128	0.1271	0.1277	0.1278	0.129
5.5	0.1291	0.128	0.1271	0.1278	0.1278	0.1289
6	0.1282	0.1276	0.129	0.1292	0.1277	0.1271
6.5	0.128	0.128	0.1292	0.1293	0.1282	0.1271
7	0.1295	0.1291	0.1278	0.1281	0.128	0.1293
7.5	0.1296	0.1296	0.1284	0.1282	0.1282	0.1298
8	0.13	0.1299	0.1283	0.1285	0.129	0.1297
8.5	0.1303	0.1293	0.1285	0.1297	0.1301	0.1284
9	0.1304	0.1301	0.1284	0.1289	0.1297	0.1299
9.5	0.1305	0.13	0.1292	0.129	0.1297	0.1307
10	0.1308	0.1306	0.1296	0.1296	0.13	0.1308
10.5	0.1312	0.1306	0.1295	0.1299	0.1305	0.131
11	0.1302	0.1303	0.1309	0.131	0.1307	0.1293
11.5	0.1304	0.1304	0.131	0.1313	0.131	0.1294
12	0.1309	0.1309	0.1312	0.1315	0.1317	0.1293
12.5	0.1316	0.1316	0.1318	0.1318	0.1318	0.1296
