# Supplementary material for: Salmonella exploits host- and bacterial-derived β-alanine for replication inside host macrophages
Source: eLife. 2025 Jun 19;13:RP103714. doi: 10.7554/eLife.103714 (PMC12178601; doi:10.7554/eLife.103714)
Supplement: Figure 1—figure supplement 8—source data 1. [file elife-103714-fig1-figsupp8-data1.xlsx]

## Sheet: Sheet1
Figure 1_figure Supplement 8	Growth curves of Salmonella WT and the gabP mutant (ΔgabP) in M9 minimal medium supplemented with β-alanine (1 mM) as the sole carbon source
Time(h)	WT			ΔgabP
0	0.1223	0.1224	0.1225	0.1224	0.1225	0.122
0.5	0.1232	0.1234	0.123	0.1231	0.1231	0.1232
1	0.1235	0.1244	0.1234	0.1238	0.1237	0.1237
1.5	0.1241	0.1251	0.124	0.1245	0.1242	0.1242
2	0.1245	0.1257	0.1244	0.1249	0.1248	0.125
2.5	0.125	0.1257	0.1249	0.1253	0.125	0.1251
3	0.1253	0.1258	0.1256	0.1253	0.1256	0.1255
3.5	0.1264	0.1258	0.1262	0.1255	0.1261	0.1262
4	0.1269	0.1261	0.1267	0.1263	0.1268	0.1264
4.5	0.1273	0.1266	0.1271	0.1271	0.1271	0.1269
5	0.1279	0.1266	0.1276	0.1273	0.1276	0.127
5.5	0.1283	0.1271	0.1282	0.1278	0.1279	0.1279
6	0.1285	0.1271	0.1285	0.1282	0.1283	0.128
6.5	0.129	0.1272	0.1291	0.1282	0.1285	0.1277
7	0.1291	0.1272	0.1294	0.1285	0.1285	0.1284
7.5	0.1292	0.1274	0.1294	0.1286	0.1287	0.1286
8	0.1293	0.1275	0.1298	0.1291	0.1292	0.1284
8.5	0.1296	0.1276	0.1301	0.1295	0.1294	0.1284
9	0.1294	0.1281	0.1305	0.1297	0.1297	0.1286
9.5	0.1293	0.1293	0.1303	0.1302	0.1298	0.1288
10	0.1294	0.1298	0.1301	0.129	0.1305	0.1294
10.5	0.1295	0.13	0.13	0.1293	0.1304	0.1299
11	0.1297	0.1309	0.13	0.1296	0.1306	0.1301
11.5	0.1299	0.1307	0.1302	0.1297	0.1308	0.1297
12	0.1299	0.1311	0.1303	0.13	0.1316	0.13
12.5	0.1301	0.1313	0.1305	0.1303	0.1308	0.1301
