# Supplementary material for: Salmonella exploits host- and bacterial-derived β-alanine for replication inside host macrophages
Source: eLife. 2025 Jun 19;13:RP103714. doi: 10.7554/eLife.103714 (PMC12178601; doi:10.7554/eLife.103714)
Supplement: Figure 1—source data 1. [file elife-103714-fig1-data1.xlsx]

## Sheet: Sheet1
Figure 1B	Principal component analysis (PCA) score plots of metabolic profiles in the mock- and Salmonella-infected (STM) groups (n = 4 biologically independent samples)
group	HIS	OHPRO	ARG	ASN	PHETH	TAU	GLN	SER	ETH	GLY	ASP	CIT	SAR	GLU	beta-ALA	THR	ALA	gamma-GABA	AMADP	OH-LYS	PRO	ORN	LYS	alpha-GABA	CYS	TYR	MET	VAL	ILE	LEU	PHE	TRP
Mock-1	1019.84	1269.62	4076.08	700.06	700.06	6128.42	2189.36	1402.18	93.23	6495.38	4993.52	370.21	13.1	7730.06	908.55	2108.5	12799	1041.16	51.24	50.04	5699.07	107.68	2758.39	10.26	33.08	2136.52	1559.1	1682.68	1185.22	2813.26	2087.71	533.64
Mock-2	440.07	1029.29	1898.28	498.35	498.35	5461.24	979.33	638.64	86.82	4145.04	3305.11	333.44	5.18	6111.31	685.93	1039.37	8063.31	662.75	28.42	28.14	3527.14	29.73	1335.12	4.69	170.9	816.05	692.95	691.43	531.9	1195.18	807.87	267.79
Mock-3	724.44	1196.38	3266.68	504.16	504.16	5993.02	459.79	1101.96	63.86	5237.23	4312.14	328.84	10.88	10565.8	844.41	1699.78	10966.1	1012.7	53.43	46.07	4308.64	83.56	2205.02	8.77	23.27	1547.78	1285.21	1350.65	888.85	2298.35	1646.41	424.01
Mock-4	562.88	1135.79	2423.7	616.92	616.92	5415.14	250.14	760.26	144.45	5267.59	4449.17	422.83	10.97	8644.56	881.96	1254.51	10468.4	983.3	48.2	53.81	4487.16	120.71	1621.02	8.49	46.25	932.86	835.58	846.58	628.83	1376.69	921.38	302.3
STM-1	543.16	1371.11	437.36	1715.76	1715.76	4347.15	89.71	463.86	163.41	5011	2345	3617.44	11.35	7962.19	458.66	1584.7	7775.88	445.98	51.89	50.73	3171.7	47.71	1400.37	59.59	72.49	687.18	599.29	846.63	707.78	1244.19	694.44	281.65
STM-2	628.28	1604.22	1642.04	1362.48	1362.48	4817.58	31.54	549.31	156.21	6352.77	3051.2	2816.91	16.16	9463.23	561.71	2069.26	9828.23	548.26	60.99	67.27	3789	52.99	1625.86	83.78	148.1	940.04	815.29	1023.98	825.63	1577.46	975.04	314.15
STM-3	652.86	1549.77	1283.47	1505.39	1505.39	4918.55	24.79	526.54	182.41	6724.82	3092.79	3348.86	16.27	9405.8	603.8	2169.8	10414	589.47	63.7	66.46	3939.86	51.36	1642.38	84.04	101.49	923.41	785.27	1058.24	861.35	1609.55	943.66	332.85
STM-4	516.77	1471.33	411.98	1757.7	1757.7	4823.92	20.21	358.94	200.35	6245.92	2962.12	3828.77	15.37	8029.45	556.95	1866.49	8948.77	533.73	56.38	52.95	3612.56	36.67	1333.97	79.93	115.36	604.06	591.94	829.4	703.1	1191.23	630.23	255.87
Amino acid concentration: ng/107 cells
Figure 1C	The concentrations of upregulated amino acids in the mock- and Salmonella-infected groups
L-hydroxyproline			L-citrulline			L-cysteine
Mock	STM		Mock	STM		Mock	STM
1269.62	1371.11		370.21	3617.44		33.08	170.9
1029.29	1604.22		333.44	2816.91		72.49	148.1
1196.38	1549.77		328.84	3348.86		23.27	101.49
1135.79	1471.33		422.83	3828.77		46.25	115.36
Amino acid concentration: ng/107 cells
Figure 1D	The concentrations of downregulated amino acids in the mock- and Salmonella-infected groups
L-asparagine			L-serine			L-aspartate			β-alanine			γ-aminobutyric acid
Mock	STM		Mock	STM		Mock	STM		Mock	STM		Mock	STM
4887.65	2085.26		1402.18	463.86		4993.52	2345		908.55	458.66		1041.16	445.98
3022.7	2689.65		638.64	549.31		3305.11	3051.2		685.93	561.71		662.75	548.26
3969.25	2480.52		1101.96	526.54		4312.14	3092.79		844.41	603.8		1012.7	589.47
2861.82	1904.6		760.26	358.94		4449.17	2962.12		881.96	556.95		983.3	533.73
Amino acid concentration: ng/107 cells
Figure 1E	Fold intracellular replication (20 h vs. 2 h) of Salmonella WT in RAW264.7 cells in the absence or presence of 0.5, 1, 2, 4 mM β-alanine
STM	STM+0.5 mM β-alanine	STM+1mM β-alanine	STM+2 mM β-alanine	STM+4 mM β-alanine
11.15	16.2	18.73	26.5	38.73
14.2	17.35	21.73	25.7	36.8
12.4	15.1	22.3	27.38	41.15
The data is normalized by the number of cells
Raw CFU counts
①	2 h	CFUs/ 103 cells		②	2 h	CFUs/ 103 cells		③	2 h	CFUs/ 103 cells
	STM	1000			STM	5000			STM	7500
	STM+0.5 mM β-alanine	1500			STM+0.5 mM β-alanine	3150			STM+0.5 mM β-alanine	10000
	STM+1mM β-alanine	1000			STM+1mM β-alanine	5000			STM+1mM β-alanine	10250
	STM+2 mM β-alanine	3000			STM+2 mM β-alanine	3000			STM+2 mM β-alanine	13000
	STM+4 mM β-alanine	2100			STM+4 mM β-alanine	6550			STM+4 mM β-alanine	9000
	20 h	CFUs/ 103 cells			20 h	CFUs/ 103 cells			20 h	CFUs/ 103 cells
	STM	11150			STM	71000			STM	93000
	STM+0.5 mM β-alanine	24308			STM+0.5 mM β-alanine	47550			STM+0.5 mM β-alanine	173469
	STM+1mM β-alanine	18727			STM+1mM β-alanine	108628			STM+1mM β-alanine	228571
	STM+2 mM β-alanine	79524			STM+2 mM β-alanine	77108			STM+2 mM β-alanine	355882
	STM+4 mM β-alanine	81364			STM+4 mM β-alanine	241000			STM+4 mM β-alanine	370370
The data is normalized by the number of cells
Figure 1F	Growth curves of Salmonella WT and the argT mutant (ΔargT) in N-minimal (left) and M9 minimal (right) medium supplemented with β-alanine (1 mM) as the sole carbon source
N-minimal (left)										M9 minimal (right)
Time(h)	STM				ΔargT					Time(h)	STM				ΔargT
0	0.1229	0.1222	0.1217	0.1219	0.1219	0.1225	0.1219	0.122		0	0.1202	0.1195	0.1202	0.1205	0.1206	0.1206	0.1205	0.1202
0.5	0.1241	0.1235	0.1231	0.1237	0.1231	0.1237	0.1234	0.1232		0.5	0.1214	0.1225	0.1215	0.1216	0.122	0.1216	0.1225	0.1215
1	0.1249	0.1243	0.1245	0.1244	0.1243	0.1247	0.1246	0.1246		1	0.1223	0.122	0.1225	0.1219	0.1223	0.1225	0.1223	0.1219
1.5	0.1249	0.1245	0.1251	0.1245	0.1241	0.1247	0.1244	0.1246		1.5	0.1225	0.1226	0.1225	0.1227	0.1231	0.1232	0.1233	0.1225
2	0.1254	0.1249	0.1254	0.125	0.1234	0.1235	0.1239	0.1233		2	0.1232	0.1232	0.1226	0.1226	0.1234	0.1238	0.1238	0.124
2.5	0.1257	0.1258	0.1254	0.1251	0.1218	0.1227	0.1228	0.1221		2.5	0.1235	0.1236	0.1234	0.1232	0.1241	0.1237	0.1245	0.1246
3	0.1258	0.126	0.1258	0.1255	0.121	0.1216	0.1218	0.1218		3	0.1236	0.1248	0.1243	0.1238	0.1244	0.1238	0.1241	0.1248
3.5	0.1261	0.1261	0.1262	0.126	0.1201	0.1211	0.1202	0.1216		3.5	0.1243	0.1245	0.1237	0.1238	0.1242	0.1237	0.1236	0.1243
4	0.1263	0.1262	0.1259	0.1264	0.1196	0.1204	0.1207	0.1195		4	0.1253	0.1252	0.1247	0.1251	0.1236	0.1243	0.1232	0.1237
4.5	0.1264	0.1267	0.1268	0.1265	0.1193	0.1204	0.1189	0.119		4.5	0.1262	0.1261	0.1258	0.1259	0.124	0.1248	0.1244	0.1232
5	0.1264	0.1268	0.1268	0.1267	0.1187	0.1196	0.1185	0.1186		5	0.1267	0.1269	0.1271	0.1265	0.1243	0.1222	0.1234	0.1224
5.5	0.127	0.1269	0.1267	0.1266	0.1183	0.1181	0.1191	0.118		5.5	0.1275	0.1272	0.1275	0.1267	0.1219	0.1214	0.1226	0.1215
6	0.1271	0.1272	0.1268	0.1268	0.1179	0.1178	0.1173	0.1187		6	0.1279	0.1281	0.1282	0.1279	0.1216	0.1204	0.1215	0.1203
6.5	0.1271	0.1272	0.127	0.1268	0.1174	0.1174	0.118	0.1171		6.5	0.1282	0.1285	0.1286	0.1284	0.1212	0.1198	0.1206	0.1195
7	0.1271	0.1272	0.127	0.1269	0.1173	0.1167	0.1175	0.1166		7	0.1285	0.1287	0.129	0.129	0.1204	0.1189	0.1195	0.1186
7.5	0.1271	0.1271	0.1268	0.1274	0.1169	0.1168	0.1172	0.1164		7.5	0.1289	0.1292	0.1295	0.1293	0.1199	0.1179	0.1184	0.1177
8	0.1272	0.1274	0.1272	0.127	0.1169	0.1165	0.1169	0.1162		8	0.129	0.1291	0.1294	0.1296	0.1192	0.1171	0.1176	0.1169
8.5	0.1273	0.1275	0.1271	0.127	0.1166	0.1164	0.1166	0.116		8.5	0.129	0.1292	0.1298	0.13	0.1185	0.1163	0.1169	0.1162
9	0.1272	0.1274	0.127	0.1274	0.1165	0.1162	0.1163	0.1159		9	0.1292	0.1293	0.1298	0.1305	0.1176	0.1155	0.1159	0.1156
9.5	0.1276	0.1275	0.1272	0.1276	0.1166	0.1155	0.1163	0.1161		9.5	0.1295	0.1299	0.13	0.1303	0.1169	0.1151	0.1155	0.1152
10	0.1273	0.1276	0.1273	0.1275	0.1163	0.1155	0.1162	0.116		10	0.1296	0.1301	0.1298	0.1303	0.1164	0.1145	0.1149	0.1148
10.5	0.1276	0.1276	0.1277	0.1279	0.1167	0.1155	0.1161	0.1162		10.5	0.1296	0.1302	0.1301	0.1307	0.116	0.1141	0.1147	0.1145
11	0.1277	0.128	0.128	0.1272	0.1157	0.1163	0.1166	0.1148		11	0.1298	0.1307	0.1302	0.1307	0.1154	0.1141	0.1143	0.1144
11.5	0.1278	0.1277	0.1279	0.1279	0.1157	0.1164	0.1168	0.115		11.5	0.1303	0.1307	0.1303	0.1307	0.1152	0.1138	0.1143	0.1141
12	0.128	0.1279	0.1281	0.128	0.1155	0.1166	0.1155	0.115		12	0.1304	0.1306	0.1304	0.1309	0.1148	0.1135	0.1141	0.1141
12.5	0.1281	0.1279	0.1282	0.1277	0.1158	0.1168	0.1154	0.1153		12.5	0.1305	0.1306	0.1305	0.131	0.1145	0.1136	0.1144	0.1142
