# Supplementary material for: Salmonella exploits host- and bacterial-derived β-alanine for replication inside host macrophages
Source: eLife. 2025 Jun 19;13:RP103714. doi: 10.7554/eLife.103714 (PMC12178601; doi:10.7554/eLife.103714)
Supplement: Figure 2—figure supplement 1—source data 1. [file elife-103714-fig2-figsupp1-data1.xlsx]

## Sheet: Sheet1
Figure 2_figure Supplement 1	Growth curves of Salmonella WT, panD mutant (ΔpanD) and the complemented strain (cpanD) in LB medium
①Time(h)	WT (OD600)	ΔpanD (OD600)	cpanD (OD600)		② Time(h)	WT (OD600)	ΔpanD (OD600)	cpanD (OD600)		③ Time(h)	WT (OD600)	ΔpanD (OD600)	cpanD (OD600)		④ Time(h)	WT (OD600)	ΔpanD (OD600)	cpanD (OD600)
0	0.1306	0.135167	0.13525		0	0.1315	0.1361	0.13455		0	0.129233	0.1364	0.1349		0	0.130967	0.135867	0.13535
0.5	0.159433	0.180333	0.17795		0.5	0.167833	0.187033	0.1777		0.5	0.165467	0.1889	0.18355		0.5	0.1673	0.190033	0.18395
1	0.232533	0.295133	0.2899		1	0.247633	0.3087	0.28845		1	0.2449	0.314833	0.30135		1	0.244933	0.313233	0.29925
1.5	0.397033	0.445733	0.4478		1.5	0.421767	0.462967	0.44635		1.5	0.4156	0.464267	0.4535		1.5	0.4145	0.459933	0.44435
2	0.5872	0.6707	0.6601		2	0.607467	0.6861	0.65855		2	0.596167	0.6859	0.657		2	0.591933	0.678033	0.6446
2.5	0.8632	1.03767	1.00435		2.5	0.891967	1.05437	0.99515		2.5	0.8779	1.06287	1.003		2.5	0.870633	1.06193	0.9827
3	1.11993	1.2402	1.2321		3	1.14487	1.2611	1.2392		3	1.13173	1.28093	1.25815		3	1.1404	1.28857	1.2616
3.5	1.25797	1.35457	1.3504		3.5	1.30077	1.3781	1.3573		3.5	1.29797	1.3941	1.3744		3.5	1.30893	1.39967	1.379
4	1.36563	1.42613	1.4277		4	1.39853	1.45133	1.4367		4	1.39103	1.45987	1.4448		4	1.39537	1.45463	1.43655
4.5	1.4074	1.45457	1.4583		4.5	1.43803	1.47753	1.4643		4.5	1.42803	1.48587	1.47045		4.5	1.42857	1.48017	1.46145
5	1.42463	1.47577	1.48265		5	1.45393	1.4993	1.48745		5	1.44337	1.50567	1.49135		5	1.44593	1.50257	1.48435
5.5	1.4378	1.49277	1.4989		5.5	1.467	1.51233	1.5039		5.5	1.4579	1.5193	1.508		5.5	1.46253	1.51847	1.5021
6	1.45307	1.50533	1.51345		6	1.48	1.52247	1.51575		6	1.47123	1.53017	1.52005		6	1.47717	1.52943	1.5146
6.5	1.46353	1.51537	1.5221		6.5	1.49027	1.52967	1.5249		6.5	1.4819	1.53723	1.5292		6.5	1.4901	1.53863	1.52675
7	1.4734	1.5225	1.5298		7	1.49953	1.53567	1.5309		7	1.49123	1.5419	1.53575		7	1.5007	1.54467	1.5351
7.5	1.48427	1.52723	1.53595		7.5	1.5077	1.5379	1.536		7.5	1.4995	1.54497	1.54085		7.5	1.5103	1.54807	1.5396
8	1.49403	1.52893	1.54		8	1.51293	1.54083	1.5379		8	1.5037	1.54687	1.5435		8	1.51557	1.55117	1.5425
8.5	1.4979	1.53243	1.5436		8.5	1.51743	1.54077	1.54105		8.5	1.50753	1.54713	1.5456		8.5	1.5206	1.55297	1.5462
9	1.49717	1.53447	1.54475		9	1.5168	1.54057	1.54235		9	1.50797	1.5464	1.54765		9	1.52423	1.55497	1.54905
9.5	1.50327	1.53593	1.54735		9.5	1.51907	1.53977	1.54175		9.5	1.50907	1.54617	1.5478		9.5	1.5261	1.55527	1.551
10	1.50797	1.5377	1.54995		10	1.5222	1.54077	1.54215		10	1.5097	1.5458	1.54865		10	1.52767	1.5566	1.55355
10.5	1.50747	1.53787	1.55055		10.5	1.51987	1.53893	1.54285		10.5	1.50947	1.54447	1.54905		10.5	1.52777	1.55667	1.55485
11	1.50867	1.5381	1.5517		11	1.51997	1.5371	1.5422		11	1.50823	1.54323	1.54905		11	1.52843	1.55587	1.55465
11.5	1.5121	1.53673	1.55195		11.5	1.5199	1.53703	1.54035		11.5	1.5066	1.541	1.5478		11.5	1.52753	1.5559	1.5554
12	1.50917	1.53673	1.55175		12	1.51837	1.5339	1.5414		12	1.50643	1.53907	1.5479		12	1.52667	1.555	1.5557
12.5	1.51077	1.53703	1.5521		12.5	1.51727	1.53223	1.54095		12.5	1.50413	1.5369	1.547		12.5	1.52603	1.55377	1.55585
