# Supplementary material for: Salmonella exploits host- and bacterial-derived β-alanine for replication inside host macrophages
Source: eLife. 2025 Jun 19;13:RP103714. doi: 10.7554/eLife.103714 (PMC12178601; doi:10.7554/eLife.103714)
Supplement: Figure 2—figure supplement 2—source data 1. [file elife-103714-fig2-figsupp2-data1.xlsx]

## Sheet: Sheet1
Figure 2_figure Supplement 2	Growth curves of Salmonella WT, panD mutant (ΔpanD) and the complemented strain (cpanD) in RPMI-1640 medium
①Time(h)	WT (OD600)	ΔpanD (OD600)	cpanD (OD600)		② Time(h)	WT (OD600)	ΔpanD (OD600)	cpanD (OD600)		③ Time(h)	WT (OD600)	ΔpanD (OD600)	cpanD (OD600)		④ Time(h)	WT (OD600)	ΔpanD (OD600)	cpanD (OD600)
0	0.144933	0.148767	0.14695		0	0.1455	0.149133	0.1455		0	0.143233	0.149667	0.1469		0	0.144933	0.146567	0.1423
0.5	0.1604	0.1746	0.1688		0.5	0.164033	0.1772	0.1697		0.5	0.161033	0.1792	0.17215		0.5	0.162767	0.175867	0.16225
1	0.176967	0.203933	0.1948		1	0.184433	0.210167	0.1988		1	0.180633	0.213267	0.20445		1	0.183067	0.207867	0.18785
1.5	0.197633	0.226467	0.21265		1.5	0.2071	0.234133	0.21525		1.5	0.201633	0.237333	0.22145		1.5	0.203633	0.2305	0.19955
2	0.230267	0.273333	0.2558		2	0.240667	0.288033	0.26245		2	0.234233	0.292267	0.26945		2	0.236167	0.284033	0.2397
2.5	0.275233	0.338767	0.3121		2.5	0.2863	0.358233	0.32195		2.5	0.2794	0.3628	0.32915		2.5	0.279367	0.349133	0.28865
3	0.338167	0.413267	0.38675		3	0.350067	0.434367	0.3948		3	0.340867	0.4383	0.4009		3	0.338867	0.420833	0.3476
3.5	0.4033	0.487967	0.4592		3.5	0.419033	0.5127	0.4673		3.5	0.405833	0.518033	0.47425		3.5	0.403133	0.4944	0.40575
4	0.4726	0.568433	0.53515		4	0.493967	0.6009	0.5473		4	0.4772	0.6064	0.55515		4	0.471567	0.573533	0.47415
4.5	0.551433	0.644733	0.6129		4.5	0.573633	0.684533	0.62915		4.5	0.552567	0.691967	0.63755		4.5	0.5437	0.649967	0.54035
5	0.6366	0.677567	0.6595		5	0.661	0.716933	0.68165		5	0.633367	0.722167	0.691		5	0.619367	0.683733	0.59325
5.5	0.665667	0.722433	0.68545		5.5	0.685467	0.759533	0.7076		5.5	0.6565	0.763067	0.7165		5.5	0.6457	0.719733	0.61375
6	0.690733	0.743333	0.7384		6	0.711667	0.771167	0.75265		6	0.680667	0.778333	0.76315		6	0.6689	0.743767	0.66675
6.5	0.725	0.7692	0.76155		6.5	0.739533	0.796767	0.7692		6.5	0.707667	0.801867	0.7773		6.5	0.701267	0.7696	0.67935
7	0.742533	0.829367	0.8189		7	0.7542	0.8509	0.82245		7	0.722667	0.8572	0.8304		7	0.7189	0.837567	0.7473
7.5	0.793067	0.850633	0.85205		7.5	0.799533	0.867967	0.8576		7.5	0.771667	0.875367	0.86995		7.5	0.777733	0.8609	0.79545
8	0.814833	0.856833	0.86455		8	0.818	0.872767	0.86965		8	0.7904	0.879733	0.88035		8	0.801033	0.8667	0.8045
8.5	0.8229	0.858767	0.86705		8.5	0.823767	0.8715	0.86995		8.5	0.797967	0.878033	0.8791		8.5	0.813967	0.867833	0.80895
9	0.8307	0.859833	0.8674		9	0.829533	0.871267	0.8683		9	0.8058	0.878033	0.8789		9	0.826033	0.8725	0.81335
9.5	0.839167	0.864633	0.8712		9.5	0.8352	0.871	0.86885		9.5	0.813633	0.878667	0.88035		9.5	0.836067	0.876033	0.81745
10	0.846933	0.8664	0.87295		10	0.841167	0.873433	0.87055		10	0.820567	0.880867	0.88225		10	0.842033	0.876667	0.8209
10.5	0.852033	0.864367	0.8699		10.5	0.846733	0.871367	0.8695		10.5	0.824367	0.877767	0.8792		10.5	0.845233	0.8773	0.82055
11	0.8557	0.863633	0.87005		11	0.850333	0.868367	0.86615		11	0.8273	0.876	0.8775		11	0.8479	0.878567	0.82855
11.5	0.857767	0.8637	0.8711		11.5	0.8524	0.8664	0.8643		11.5	0.828367	0.8733	0.8752		11.5	0.8515	0.881833	0.83455
12	0.859167	0.8661	0.87425		12	0.854033	0.864267	0.86285		12	0.830033	0.8722	0.8744		12	0.854767	0.885333	0.8381
12.5	0.8618	0.868667	0.87755		12.5	0.855367	0.8659	0.86515		12.5	0.831767	0.872933	0.87535		12.5	0.858933	0.8887	0.8428
