# Supplementary material for: Salmonella exploits host- and bacterial-derived β-alanine for replication inside host macrophages
Source: eLife. 2025 Jun 19;13:RP103714. doi: 10.7554/eLife.103714 (PMC12178601; doi:10.7554/eLife.103714)
Supplement: Figure 2—figure supplement 3—source data 1. [file elife-103714-fig2-figsupp3-data1.xlsx]

## Sheet: Sheet1
Figure 2_figure supplement 3	Fold intracellular replication (20 h vs. 2 h) of Salmonella enterica serovar Typhi Ty2 wild type (WT), the panD mutant (ΔpanD) in human THP-1 monocyte like cell line
WT (S.Typhi)	ΔpanD(S.Typhi)
12.69	5.04
11.27	5.08
11.53	5.56
13.41	4.3
The data is normalized by the number of cells
Raw CFU counts
①	2 h	CFUs/ 103 cells		②	2 h	CFUs/ 103 cells		③	2 h	CFUs/ 103 cells		④	2 h	CFUs/ 103 cells
	WT (S.Typhi)	1310			WT (S.Typhi)	1135			WT (S.Typhi)	1700			WT (S.Typhi)	1868
	ΔpanD(S.Typhi)	2243			ΔpanD(S.Typhi)	2280			ΔpanD(S.Typhi)	1903			ΔpanD(S.Typhi)	2130
	20 h	CFUs/ 103 cells			20 h	CFUs/ 103 cells			20 h	CFUs/ 103 cells			20 h	CFUs/ 103 cells
	WT (S.Typhi)	16625			WT (S.Typhi)	12800			WT (S.Typhi)	19600			WT (S.Typhi)	25050
	ΔpanD(S.Typhi)	11297			ΔpanD(S.Typhi)	11593			ΔpanD(S.Typhi)	10573			ΔpanD(S.Typhi)	9065
The data is normalized by the number of cells
