# Supplementary material for: Salmonella exploits host- and bacterial-derived β-alanine for replication inside host macrophages
Source: eLife. 2025 Jun 19;13:RP103714. doi: 10.7554/eLife.103714 (PMC12178601; doi:10.7554/eLife.103714)
Supplement: Figure 3—source data 1. [file elife-103714-fig3-data1.xlsx]

## Sheet: Sheet1
Figure 3B	Survival curves of mice infected i.p. with Salmonella WT, ΔpanD, or cpanD. n = 10 mice per group										Figure 3D	Liver and spleen bacterial burdens and body weights of mice infected with Salmonella WT, ΔpanD, or cpanD on day 3 postinfection. n = 7 mice per group
Days post infection	WT	ΔpanD	cpanD								WT-liver	ΔpanD-liver	cpanD-liver
9	1										7.24506	4.05845	5.56692
8	1										7.37347	4.31158	5.18676
5	1										7.56427	4.16827	5.12446
5	1										7.7645	4.22715	5.47075
4	1										7.53387	3.71156	4.90367
4	1										6.26269	3.87704	5.30369
4	1										6.744	3.88472	5.32065
4	1										WT-spleen	ΔpanD-spleen	cpanD-spleen
4	1										8.23241	5.35565	5.79475
4	1										8.5891	4.11351	5.68783
10		0									8.09884	4.9899	5.88318
10		0									8.2309	4.09108	5.98549
10		0									8.1105	4.33255	5.96933
10		0									7.5307	4.05552	5.61114
10		0									7.51713	4.08092	5.62554
10		0									WT-body weight	ΔpanD-body weight	cpanD-body weight
10		0									12.98	15.473	12.47
10		0									13.08	15.529	13.692
10		0									12.352	15.024	12.789
10		0									10.508	15.261	10.918
10			0								10.566	15.56	12.32
10			1								11.87	17	12.31
10			1								11.04	13.59	13.046
9			1								bacterial burdens: log10(CFU/g organ)
9			1								body weight: g
9			1
8			1
7			1
7			1
6			1
0 represents survival, 1 represents death
Figure 3C	body weight dynamics of mice infected i.p. with Salmonella WT, ΔpanD, or cpanD. n = 10 mice per group
Days post infection	WT										ΔpanD										cpanD
0	16.67	15.92	15.45	16.58	16.37	15.01	15.98	16.43	17.42	15.79	16.11	16.42	16.26	17.11	16.81	16.03	16.71	16.57	16.52	16.12	17.4	16.41	18.37	17.31	16.73	15.97	17.53	16.25	15.87	17.5
1	16.17	14.46	16.64	15.33	15.14	15.38	17.16	14.63	13.85	14.56	14.78	15.53	15.97	14.62	15.07	16.36	14.71	15.7	15.63	14.68	16.21	17.13	17.54	18.66	17.54	16.21	16.55	17.98	18.84	17.83
2	14.99	13.54	12.59	16.32	12.69	13.15	14.61	14.12	14.15	14.48	13.96	14.09	15.87	16.07	14.86	13.92	14.95	14.33	14.81	15.4	17.09	18.49	16.27	18.87	17.24	16.31	17.49	16.38	17.72	17.17
3	11.6	12.82	12.05	12.86	13.29	13.41	12.13	15.28	13.61	12.77	16.74	16.85	16.22	17.27	15.51	16.58	18.52	16.75	15.95	16.45	17.37	17.96	16.06	17.03	15.62	15.48	15.77	13.87	16.1	15.17
4	14.1	12.14	10.74	12.68							17.53	18.55	17.34	17.39	17.96	17.97	17.93	17.08	17.46	16.44	12.66	14.66	16.9	15.13	15.01	16.92	15.55	15.02	16.13	15.06
5	13.46	12.32									17.96	17.86	17.13	18.19	17.35	17.92	18.01	15.82	17.61	17.99	13.68	13.78	13.91	14.14	15.14	14.52	14.16	15.16	14.53	15.71
6	12.01	11.09									15.02	16.63	18.46	16.22	16.98	17.73	16.89	17.15	17.1	17.41	13.19	12.64	13.39	13	14.44	13.69	13.49	14.3	14.36
7	12.25	12.67									17.7	17.54	16.74	17.04	16.93	18.19	15.14	17.53	17.3	18.81	12.7	13	12.31	13.63	13.99	12.49	12.9
8	12.14										18.28	18.88	18.28	18.71	16.58	18.75	18.34	18.41	17.84	18.26	12.44	12.29	11.75	12.08	12.53	13.12
9											17.86	16.64	18.26	18.22	17.74	18.14	17.24	18.14	19.14	17.95	12.39	12.49	11.93
10											19.36	18.36	16.84	18.41	17.94	18.22	18.11	18.14	18.19	18.23	12.94
body weight: g
Figure 3E	Number of intracellular Salmonella WT, ΔpanD, and cpanD strains per liver cell at 5 day postinfection
WT	ΔpanD	cpanD
2	1	1
1	1	5
1	1	1
7	1	8
4	1	1
6	2	1
2	1	7
2	4	2
5	1	6
2	1	2
1	3	4
4	1	2
2	2	2
2	2	4
3	2	5
10	5	3
5	1	1
10	2	10
8	2	2
2	1	5
7	2	4
6	1	4
5	1	1
1	1	1
1	1	6
2	1	6
1	1	5
3	1	4
4	1	4
1	2	4
2	1	6
3	2	5
3	1	1
2	1	1
2	1	8
2	1	1
1	3	2
3	2	1
2	3	1
2	1	3
1	1	6
1	2	4
7	1	11
4	2	8
1	1	3
3	2	4
1	3	6
2	1	2
2	1	7
7	1	3
1	1	2
2	2	10
2	2	5
3	2	3
11	1	4
7	2	7
6	2	1
2	1	1
7	1	1
9	1	1
6	2	5
1	2	1
4	1	6
3	3	7
2	1	2
2	1	2
2	2	1
3	1	2
1	2	3
3	1	2
1	3	6
1	3	2
1	1	9
2	3	1
1	1	2
2	2	2
5	1	1
3	1	1
1	3	2
1	1	4
