# Supplementary material for: Salmonella exploits host- and bacterial-derived β-alanine for replication inside host macrophages
Source: eLife. 2025 Jun 19;13:RP103714. doi: 10.7554/eLife.103714 (PMC12178601; doi:10.7554/eLife.103714)
Supplement: Figure 4—figure supplement 1—source data 1. [file elife-103714-fig4-figsupp1-data1.xlsx]

## Sheet: Sheet1
Figure 4_figure Supplement 1	The TPM value of SPI-2 genes between WT and the panD mutant
gene ID	WT-1	WT-2	WT-3	mutant-1	mutant-2	mutant-3
ssrB	54.43	64.53	57.13	122.67	96.29	125.53
ssrA	87.45	109.44	96.43	54.99	60.24	67.38
ssaB	537.84	634.01	675.63	710.83	740.06	795.73
ssaC	136.4	189.06	168.89	306.75	269.74	347
ssaD	120.47	86.07	80.06	235.69	199.52	274.39
ssaE	417.48	501.63	505.18	903.66	722.5	863.34
sseA	7451.8	9444.88	9097.4	11055.4	11139.8	12841.7
sseB	4467.5	4177.98	3747.91	5511.02	5394.77	6748.43
sscA	2450.28	2289.94	2075.76	3031.73	3023.02	3656.32
sseC	1375.27	1233.47	1092.63	1647.35	1535.42	2048.78
sseD	729.04	178.65	134.16	187.47	172.34	242.35
sseE	880.02	719.75	570.36	825.87	770.57	1097.96
sscB	491.12	483.21	434.49	618.6	569.18	782.15
sseF	66.44	73.29	64.54	70.49	65.08	86.54
sseG	21.54	29.43	24.36	24.82	24.83	24.19
ssaG	1371.24	394.62	445.11	465.25	491.61	466.74
ssaH	1561.72	1821.26	1583.38	2371.17	2730.04	3010.02
ssaI	1270.81	1663.44	1432.83	1655.62	2060.59	2106.11
ssaJ	1251.18	1206.14	1151.3	1188.91	1264.58	1389.28
ssaK	293.97	367.11	353.37	392.18	376.84	474.62
ssaL	321.57	332.69	303.19	377.39	339.11	425.78
ssaM	765.45	916.4	952.62	582.3	685.48	626.66
ssaV	99.32	96.86	104.73	131.95	116.11	155.97
ssaN	191.24	185.67	167.45	225.14	179.36	250.76
ssaO	64.9	64.1	58.26	94.02	85.98	116.24
ssaP	38.9	34.03	29.81	58.38	41.91	54.32
ssaQ	65.29	52.44	55.77	99.42	79.57	100.87
ssaR	1496.44	2066.36	2066.34	1516	1714.98	1599.65
ssaS	291.39	394.17	403.61	329.57	295.35	368.3
ssaT	171.37	192.13	190.56	245.22	203.36	250.49
ssaU	23.64	12.12	16.71	12.3	10.38	13.19
