# Supplementary material for: Salmonella exploits host- and bacterial-derived β-alanine for replication inside host macrophages
Source: eLife. 2025 Jun 19;13:RP103714. doi: 10.7554/eLife.103714 (PMC12178601; doi:10.7554/eLife.103714)
Supplement: Figure 4—figure supplement 2—source data 1. [file elife-103714-fig4-figsupp2-data1.xlsx]

## Sheet: Sheet1
Figure 4_figure Supplement 2	The TPM value of SPI-1 genes between WT and the panD mutant
gene ID	WT-1	WT-2	WT-3	mutant-1	mutant-2	mutant-3
sitA	462.27	568.73	513.94	166.06	201.17	186.96
sitB	76.04	89.24	75.83	41.52	45.03	46.51
sitC	76.63	85.84	70.61	38.22	44.67	47.47
sitD	22.27	87.23	83.39	35.71	37.99	36.62
avrA	19.43	28.09	26.69	45.38	43.72	51.49
sprB	3.68	5.25	4.85	3.43	2.61	2.74
hilC	5.75	10.69	10.46	6.6	6.68	8.16
orgC	16.8	18.95	19.27	11.32	15.92	14.52
orgB	20.51	23.34	25.49	16.23	14.9	20.18
orgA	2.75	5.41	5.33	4.68	5.68	5.11
prgK	3.05	3.64	2.46	4.72	3.13	2.06
prgJ	0.58	2.5	5.14	3.33	3.56	2.61
prgI	1.53	0.37	0.38	1.32	0	2.46
prgH	1.42	0.64	0.49	0.86	0.93	1.19
hilD	6.72	7.27	8.03	13.69	13.26	15.08
hilA	0.7	0.82	0.94	0.91	0.95	1.15
iagB	4.4	5.91	5.83	7.56	7.15	5.62
sptP	10.01	6.83	5.95	16.21	12.96	18.28
sicP	9.03	6.82	6.25	9.8	9.4	12.44
iacP	0	1.22	0	1.95	3.13	1.08
sipA	3.5	2.2	2.26	4.03	3.78	3.87
sipD	1.05	1.85	2.28	1.75	2.2	2.53
sipC	1.14	1.27	1.35	1.59	2.13	1.92
sipB	2.38	2.39	2.51	2.54	2.99	3.67
sicA	0.63	0.79	0.32	0.67	0.41	0.66
spaS	0.39	0.95	0.83	0.53	0.16	0.56
spaR	0.06	0.47	0.41	0.5	0.23	0.49
spaQ	1.05	1.67	1.38	0	0	0
spaP	0.36	0.65	0.22	0.61	0.28	0
spaO	1.38	0.97	0.67	1.65	1.33	1.63
invJ	0.96	0.77	0.8	0.93	1.34	1.19
invI	0.42	0.7	0.84	1.34	1.07	0.76
invC	1.42	1.71	1.12	1.54	1.86	2.97
invB	0.5	0.97	0.16	0.39	0.62	0
invA	0.49	0.63	0.46	0.52	0.52	0.5
invE	0.15	0.26	0.52	0.41	0.69	0.21
invG	0.38	0.88	0.76	0.6	0.7	0.79
invF	0.81	1	1	1.52	1.14	0.87
invH	2.43	2.86	3.33	1.79	1.92	2.83
