# Supplementary material for: Salmonella exploits host- and bacterial-derived β-alanine for replication inside host macrophages
Source: eLife. 2025 Jun 19;13:RP103714. doi: 10.7554/eLife.103714 (PMC12178601; doi:10.7554/eLife.103714)
Supplement: Figure 4—figure supplement 3—source data 1. [file elife-103714-fig4-figsupp3-data1.xlsx]

## Sheet: Sheet1
Figure 4_figure Supplement 3	The TPM value of SPI-3, 4, 5 genes between WT and the panD mutant
sugR	31.13	37.11	30.34	34.78	33.49	36.45
rhuM	20.57	25.04	24.87	18.96	17.56	19.73
rmbA	0.08	0.74	0.49	0.4	0.21	0.11
misL	2.45	4.05	3.48	3.54	3.7	3.65
fidL	11.18	15.2	17.45	39	38.37	43.45
marT	15.09	21.81	22.35	32.99	34.87	34.62
slsA	56.89	72.82	66.55	189.35	172.06	201.63
cigR	2751.09	2971.79	3007.68	2280.7	2630.52	2612.59
mgtB	175.31	284.42	245.48	476.26	512.25	504.21
mgtC	1201.93	1296.7	1355.1	3365.33	3488.36	3430.44
yicL	19.32	24.14	27.37	68.41	57.09	71.61
siiA	2.35	2.85	2.13	0.68	0.97	2.06
siiB	15.22	12.65	12.5	7.62	16.32	9.99
siiC	2.5	3.06	2.08	0.83	1.13	2.34
siiD	2.35	3.13	3.72	1.66	1.16	1.91
siiE	6.83	6.66	6.44	8.11	7.72	8.87
siiF	2.76	3.52	3.9	8.86	7.41	7.45
pipA	6.24	6.81	6.33	11.31	9.23	9.78
pipB2	1535.6	1345.22	1432.77	2081.5	1639.71	2076.29
pipC	17.71	17.97	17.54	24.4	28.4	22.4
orfX	109.12	151.01	151.16	16.31	32.65	19.25
pipD	426.41	451.34	441.69	256.63	293.23	279.03
