# Supplementary material for: Salmonella exploits host- and bacterial-derived β-alanine for replication inside host macrophages
Source: eLife. 2025 Jun 19;13:RP103714. doi: 10.7554/eLife.103714 (PMC12178601; doi:10.7554/eLife.103714)
Supplement: Figure 4—source data 1. [file elife-103714-fig4-data1.xlsx]

## Sheet: Sheet1
Figure 4E	The TPM value of genes (activated by PanD) between WT and the panD mutant
gene ID	WT-1	WT-2	WT-3	mutant-1	mutant-2	mutant-3
metF	652.46	747.9	665.21	14.78	18.97	16.21
metR	205.07	275.11	254.72	5.97	6.13	7.19
metB	443.25	409.74	368.27	19.98	22.66	22.43
metA	243.09	255.6	239.28	14.49	16.7	16.79
metL	161.78	168.52	142.67	11.31	13.27	12.1
metK	377.86	422.01	387.29	37.29	36.05	34.84
metE	43.93	44.99	43.67	4	5.66	5.53
metN	94.2	124.07	124.96	18.71	18.28	20.11
metC	99.69	135.67	124.34	27.69	27.53	25.71
metG	44.4	52.47	45.13	16.61	19.03	18.01
fadB	1242.69	1185.79	1048.77	5.3	6.34	6.12
fadA	1063.75	1345.85	1147.5	8.34	10.7	10.25
fadE	1247.57	1163.49	1029.17	19.51	25.05	21.27
fadI	131.7	124.26	123.48	4.22	4.9	4.99
fadD	280.77	316.29	311.91	12.66	15.02	12.63
fadH	197.73	213.96	204.49	12.43	14.26	13.78
fadL	144.5	182.52	171.48	22.99	28.35	18.69
fadJ	319.08	352.3	331	105.55	122.21	111.39
leuO	40.09	53.4	45.09	6.77	7.15	7.2
leuD	60.58	56.63	56.62	12.26	11.53	15.52
leuC	57.59	58.91	55.62	14.19	14.59	14.51
leuA	125.51	82.4	83.86	26.57	25.5	27.82
hisH	162.53	166.89	161.67	41.87	45.45	53.9
hisC	280.67	287.34	268.18	78.15	80.35	92.12
hisF	214.8	197.01	186.86	68.01	57.43	70.96
hisD	170.87	144.61	137.67	51.02	50.66	54.95
hisG	298.2	276.86	287.91	122.51	111.42	115.41
hisS	65.75	71.34	69.8	28.95	31.01	30.42
znuA	382.61	431.85	424.8	43.85	51.66	44.12
znuC	270.47	327.17	356.71	28.81	47.35	36.34
znuB	75.39	103.63	103.58	12.37	14.35	12.06
mglA	82.4	105.62	101.38	6.01	8.49	5.73
mglB	469.5	509.99	521.52	50.34	61.24	55
kdpA	406.25	292.78	320.61	47.51	52.28	56.47
kdpB	104.07	107.26	107.55	16.56	17.65	18.54
potG	58.24	45.57	40.59	11.37	12.9	11.68
potF	195.05	192.58	181.14	43.89	57.95	51.2
potH	22.7	13.47	11.68	5.33	4	3.96
potI	22.61	16.21	17.85	6.23	7.92	7.57
Figure 4F	qRT‒PCR analysis of the mRNA levels (Relative gene expression) of 16 selected downregulated DEGs in Salmonella WT, ΔpanD, and cpanD.
	WT			ΔpanD			cpanD
fadH	1	1	1	0.31	0.434	0.277	0.956	1.229	1.127
fadB	1	1	1	0.295	0.447	0.278	0.844	1.221	1.14
fadI	1	1	1	0.305	0.448	0.295	0.901	1.219	1.129
fadD	1	1	1	0.33	0.468	0.27	0.938	1.126	1.107
fadE	1	1	1	0.31	0.406	0.245	0.926	1.18	1.107
metR	1	1	1	0.265	0.458	0.277	0.981	1.259	1.22
hisG	1	1	1	0.508	0.313	0.339	0.92	0.93	1.201
hisF	1	1	1	0.506	0.301	0.448	0.965	0.996	1.455
leuD	1	1	1	0.481	0.316	0.344	1.023	1.006	1.249
leuO	1	1	1	0.486	0.289	0.412	1.007	0.976	1.408
mglA	1	1	1	0.307	0.351	0.258	0.874	1.174	0.968
mglB	1	1	1	0.3	0.437	0.276	0.907	1.161	1.104
kdpA	1	1	1	0.509	0.32	0.424	1.078	1.058	1.471
kdpB	1	1	1	0.514	0.336	0.533	1.037	1.037	1.513
potG	1	1	1	0.489	0.316	0.409	1.088	1.2	1.373
potF	1	1	1	0.49	0.355	0.366	1.01	1.065	1.203
znuA	1	1	1	0.35	0.453	0.332	0.903	1.179	1.137
