# Supplementary material for: Salmonella exploits host- and bacterial-derived β-alanine for replication inside host macrophages
Source: eLife. 2025 Jun 19;13:RP103714. doi: 10.7554/eLife.103714 (PMC12178601; doi:10.7554/eLife.103714)
Supplement: Figure 5—source data 1. [file elife-103714-fig5-data1.xlsx]

## Sheet: Sheet1
Figure 5A	Liver bacterial burdens of mice infected with Salmonella WT, ΔfadAB, ΔmetR, ΔhisABCDFGHL, ΔkdpABC, ΔmglABC, ΔpotFGHI, or ΔleuO on day 3 postinfection. n = 5 mice per group.
WT	ΔfadAB	ΔmetR	ΔleuO	ΔhisABCDFGHL	ΔkdpABC	ΔmglABC	ΔpotFGHI
7.38769	7.44571	7.62358	7.32222	4.61979	7.64323	7.87506	6.75333
7.77281	7.90193	7.47611	7.53125	7.48625	7.68395	7.68473	7.54801
7.30103	7.86943	7.64098	7.63224	7.31029	7.73222	7.70757	7.42421
7.36494	7.55219	7.68496	7.40816	7.17266	7.75579	7.93019	7.73884
7.80692	7.81551	7.65682	7.65155	7.09068	7.57742	7.40265	7.594
bacterial burdens: log10(CFU/g liver)
Figure 5B	Spleen bacterial burdens of mice infected with Salmonella WT, ΔfadAB, ΔmetR, ΔhisABCDFGHL, ΔkdpABC, ΔmglABC, ΔpotFGHI, or ΔleuO on day 3 postinfection. n = 5 mice per group
WT	ΔfadAB	ΔmetR	ΔleuO	ΔhisABCDFGHL	ΔkdpABC	ΔmglABC	ΔpotFGHI
8.08602	8.06769	8.70664	8.25874	5.25473	8.74819	8.56831	7.3827
8.2226	8.65276	8.31047	8.34391	8.24523	8.25722	8.32596	8.30304
8.23307	8.51504	8.4979	8.36272	8.2232	8.27007	8.36905	8.21576
8.64487	8.44716	8.63648	8.17118	7.8802	8.63078	8.84807	7.93247
7.60691	8.58317	8.16734	8.11628	8.07025	7.82391	7.80618	8.38674
bacterial burdens: log10(CFU/g spleen)
Figure 5C	Body weight of mice infected with Salmonella WT, ΔfadAB, ΔmetR, ΔhisABCDFGHL, ΔkdpABC, ΔmglABC, ΔpotFGHI, or ΔleuO on day 3 postinfection. n = 5 mice per group.
WT	ΔfadAB	ΔmetR	ΔleuO	ΔhisABCDFGHL	ΔkdpABC	ΔmglABC	ΔpotFGHI
12.06	12.41	12.94	11.82	12.61	11.27	10.79	13.08
12.18	12.19	12.13	11.79	11.74	11.07	11.48	11.94
11.99	12.19	12.89	11.59	11.32	10.77	11.12	12.13
11.33	15.15	13	11.54	14.65	10.39	10.16	11.33
11.88	12.09	11.32	12.06	11.97	11.83	11.98	12.2
body weight: g
Figure 5D	Liver and spleen bacterial burdens and body weights of mice infected with Salmonella WT, ΔpanD, ΔznuA or ΔpanDΔznuA on day 3 postinfection. n = 5 mice per group
WT-liver	ΔznuA-liver	ΔpanD-liver	ΔpanDΔznuA-liver
7.6158	6.6854	4.98916	2.9167
7.39851	6.56397	4.90348	3.19859
7.38048	6.43771	4.33553	2.77989
7.49336	6.73569	4.60906	3.21871
7.44102	4.14181	3.96302	2.88606
WT-spleen	ΔznuA-spleen	ΔpanD-spleen	ΔpanDΔznuA-spleen
8.57458	7.12014	5.69085	4.14965
8.22331	6.87662	5.24033	4.05552
8.54046	6.98449	4.59063	3.62434
8.46729	7.18339	4.79048	4.11539
8.68847	5.21163	4.73339	4.24159
WT-body weight	ΔznuA-body weight	ΔpanD-body weight	ΔpanDΔznuA-body weight
11.041	13.921	15.974	18.33
11.167	13.853	15.616	18.86
11.38	13.087	17.125	18.78
10.965	16.911	16.14	18.29
10.367	13.544	16.07	17.65
bacterial burdens: log10(CFU/g organ)
body weight: g
Figure 5E	Zinc level of mouse (infected with Salmonella WT or ΔpanD for 3 days) liver macrophages
WT	ΔpanD
1	3.23831
1	3.14851
1	3.10198
The data is normalized by the number of cells
