# Supplementary material for: Salmonella exploits host- and bacterial-derived β-alanine for replication inside host macrophages
Source: eLife. 2025 Jun 19;13:RP103714. doi: 10.7554/eLife.103714 (PMC12178601; doi:10.7554/eLife.103714)
Supplement: Figure 6—source data 1. [file elife-103714-fig6-data1.xlsx]

## Sheet: Sheet1
Figure 6A	Zinc levels of RAW264.7 cells after infection with Salmonella WT or ΔpanD for 8 h
WT	ΔpanD
1	1.78808
1	1.79408
1	1.81235
The data is normalized by the number of cells
Figure 6B	Fold intracellular replication (20 h vs. 2 h) of Salmonella WT, ΔpanD, ΔznuA and ΔpanDΔznuA in RAW264.7 cells
WT	ΔpanD	ΔznuA	ΔpanDΔznuA
11.6	5.3	6.7	5.31
16.34	6.02	6.45	4.41
13.39	5.48	5.35	4.22
The data is normalized by the number of cells
Raw CFU counts
①	2 h	CFUs/ 103 cells		②	2 h	CFUs/ 103 cells		③	2 h	CFUs/ 103 cells
	WT	5000			WT	4100			WT	1650
	ΔpanD	1000			ΔpanD	3200			ΔpanD	9300
	ΔznuA	2300			ΔznuA	3100			ΔznuA	1000
	ΔpanDΔznuA	9900			ΔpanDΔznuA	3540			ΔpanDΔznuA	4500
	20 h	CFUs/ 103 cells			20 h	CFUs/ 103 cells			20 h	CFUs/ 103 cells
	WT	58000			WT	67000			WT	22100
	ΔpanD	5300			ΔpanD	19275			ΔpanD	51000
	ΔznuA	15407			ΔznuA	20000			ΔznuA	5351
	ΔpanDΔznuA	27839			ΔpanDΔznuA	9762			ΔpanDΔznuA	11890
The data is normalized by the number of cells
Figure 6C	Fold intracellular replication (20 h vs. 2 h) of Salmonella WT and ΔpanD in RAW264.7 cells in the presence or absence of 100μM ZnSO4
WT	ΔpanD	ΔpanD+100μM ZnSO4
10.31	5.25	11.19
14.42	5.37	13.29
11.69	5.68	13.3
The data is normalized by the number of cells
Raw CFU counts
①	2 h	CFUs/ 103 cells		②	2 h	CFUs/ 103 cells		③	2 h	CFUs/ 103 cells
	WT	1300			WT	6000			WT	2760
	ΔpanD	2600			ΔpanD	1520			ΔpanD	2900
	ΔpanD+100μM ZnSO4	5400			ΔpanD+100μM ZnSO4	1300			ΔpanD+100μM ZnSO4	9500
	20 h	CFUs/ 103 cells			20 h	CFUs/ 103 cells			20 h	CFUs/ 103 cells
	WT	13400			WT	86500			WT	32267
	ΔpanD	13650			ΔpanD	8157			ΔpanD	16462
	ΔpanD+100μM ZnSO4	60440			ΔpanD+100μM ZnSO4	17275			ΔpanD+100μM ZnSO4	126345
The data is normalized by the number of cells
Figure 6D	Fold intracellular replication (20 h vs. 2 h) of Salmonella WT and ΔznuA in RAW264.7 cells in the presence or absence of 1 mM β-alanine
WT	ΔznuA	ΔznuA+1mM β-alanine
11.04	5.52	6.29
15.41	6.74	6.94
12.96	7.8	6.8
The data is normalized by the number of cells
Raw CFU counts
①	2 h	CFUs/ 103 cells		②	2 h	CFUs/ 103 cells		③	2 h	CFUs/ 103 cells
	WT	1200			WT	3700			WT	2330
	ΔznuA	8530			ΔznuA	1000			ΔznuA	2010
	ΔznuA+1mM β-alanine	11000			ΔznuA+1mM β-alanine	4700			ΔznuA+1mM β-alanine	5000
	20 h	CFUs/ 103 cells			20 h	CFUs/ 103 cells			20 h	CFUs/ 103 cells
	WT	13250			WT	57000			WT	30200
	ΔznuA	47071			ΔznuA	6737			ΔznuA	15687
	ΔznuA+1mM β-alanine	69164			ΔznuA+1mM β-alanine	32626			ΔznuA+1mM β-alanine	34000
The data is normalized by the number of cells
